# Supplementary material
Source: Royal Society of Chemistry journal article supplement (doi:10.1039/d6cp00461j)

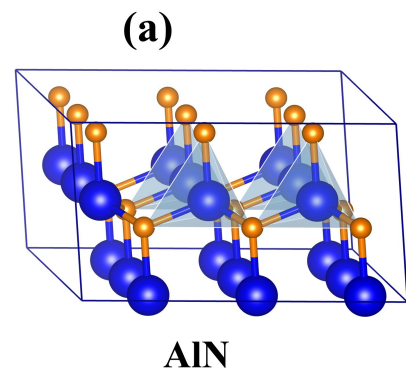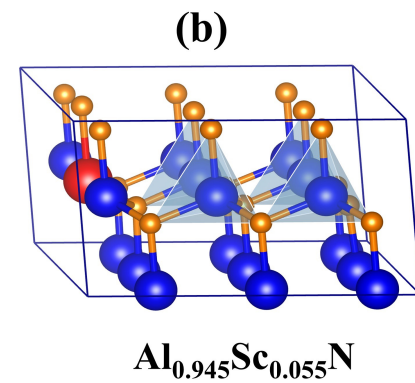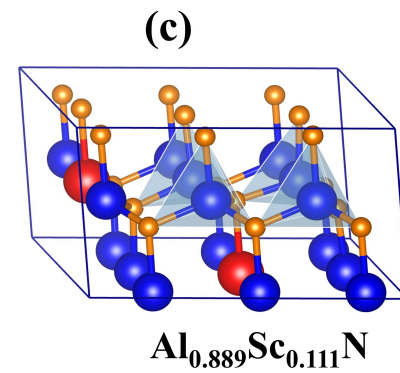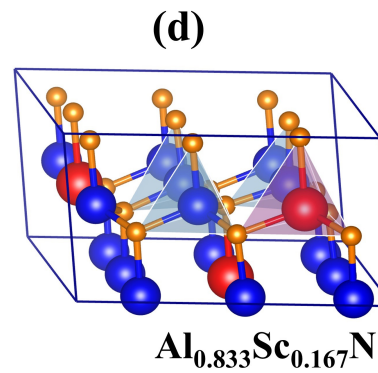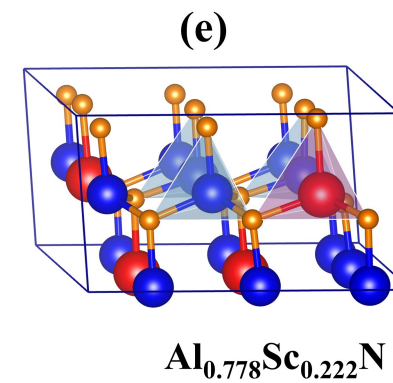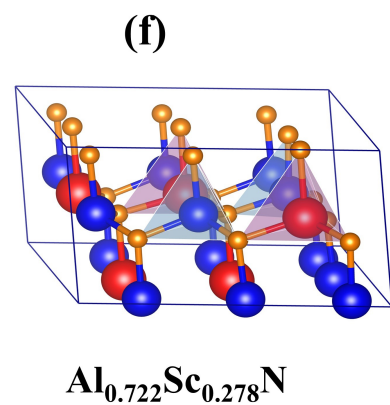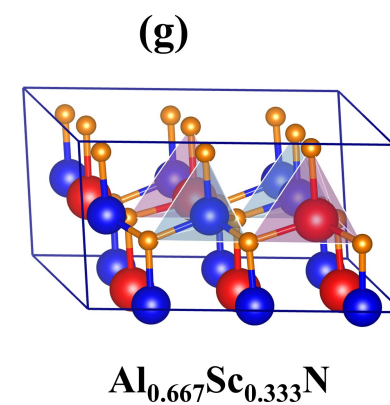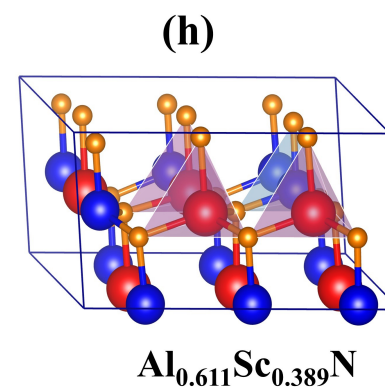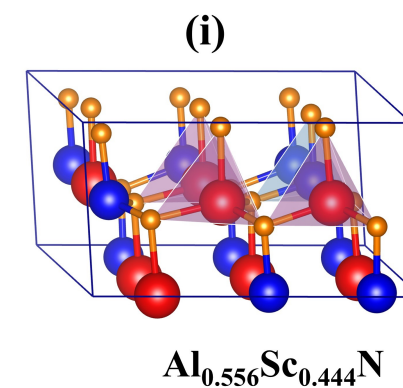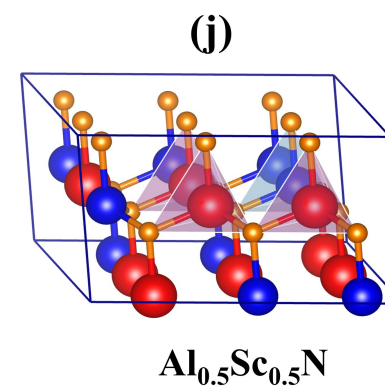

Supplement: d6cp00461j1.pdf [file d6cp00461j1.pdf]

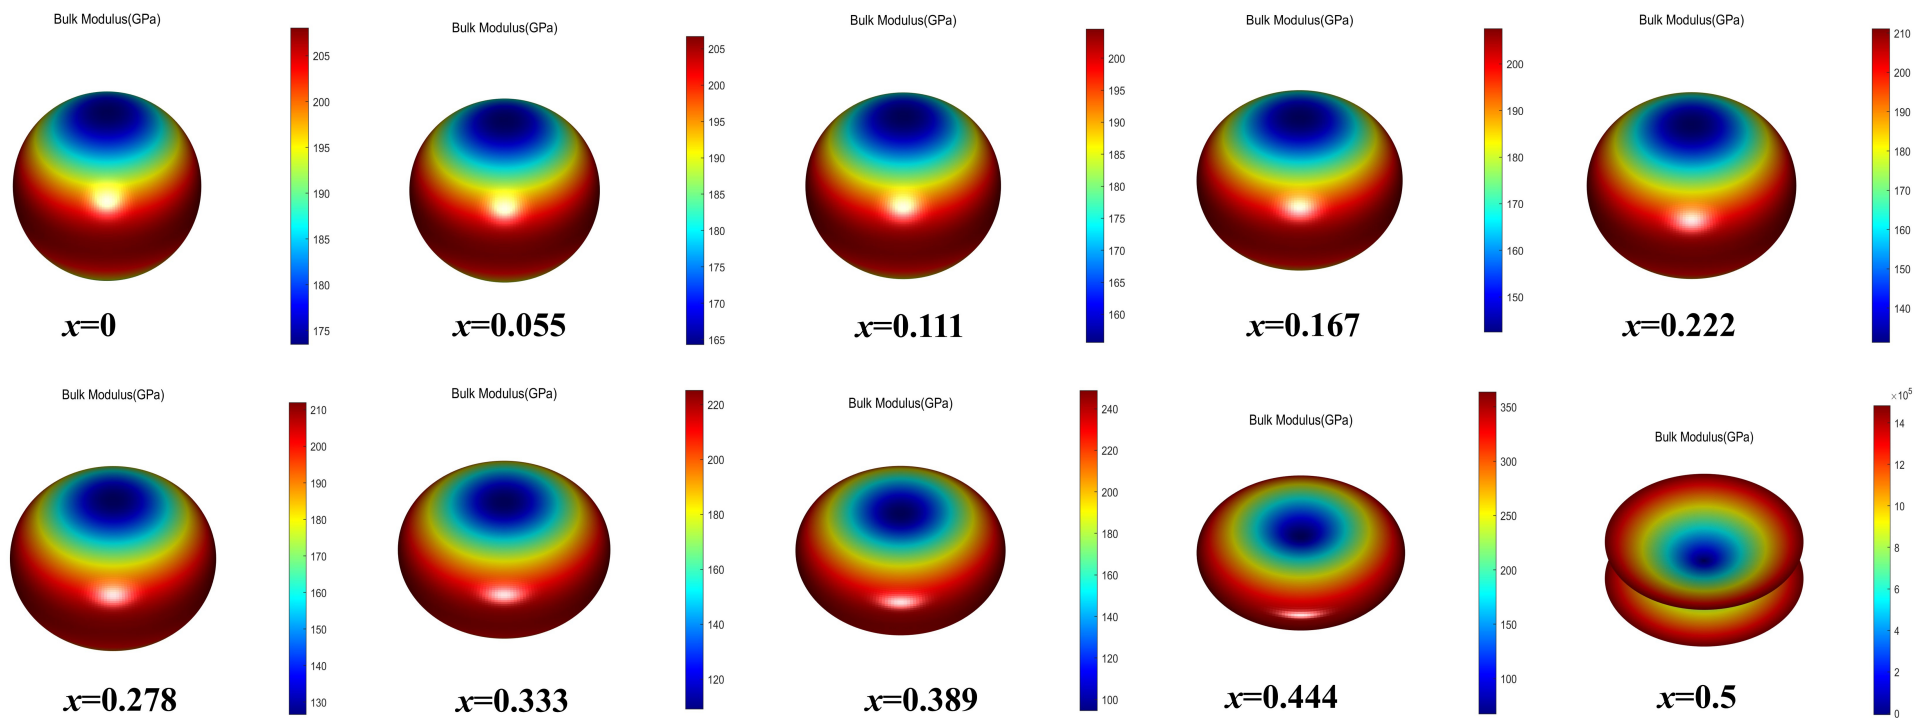

Supplement: d6cp00461j10.pdf [file d6cp00461j10.pdf]

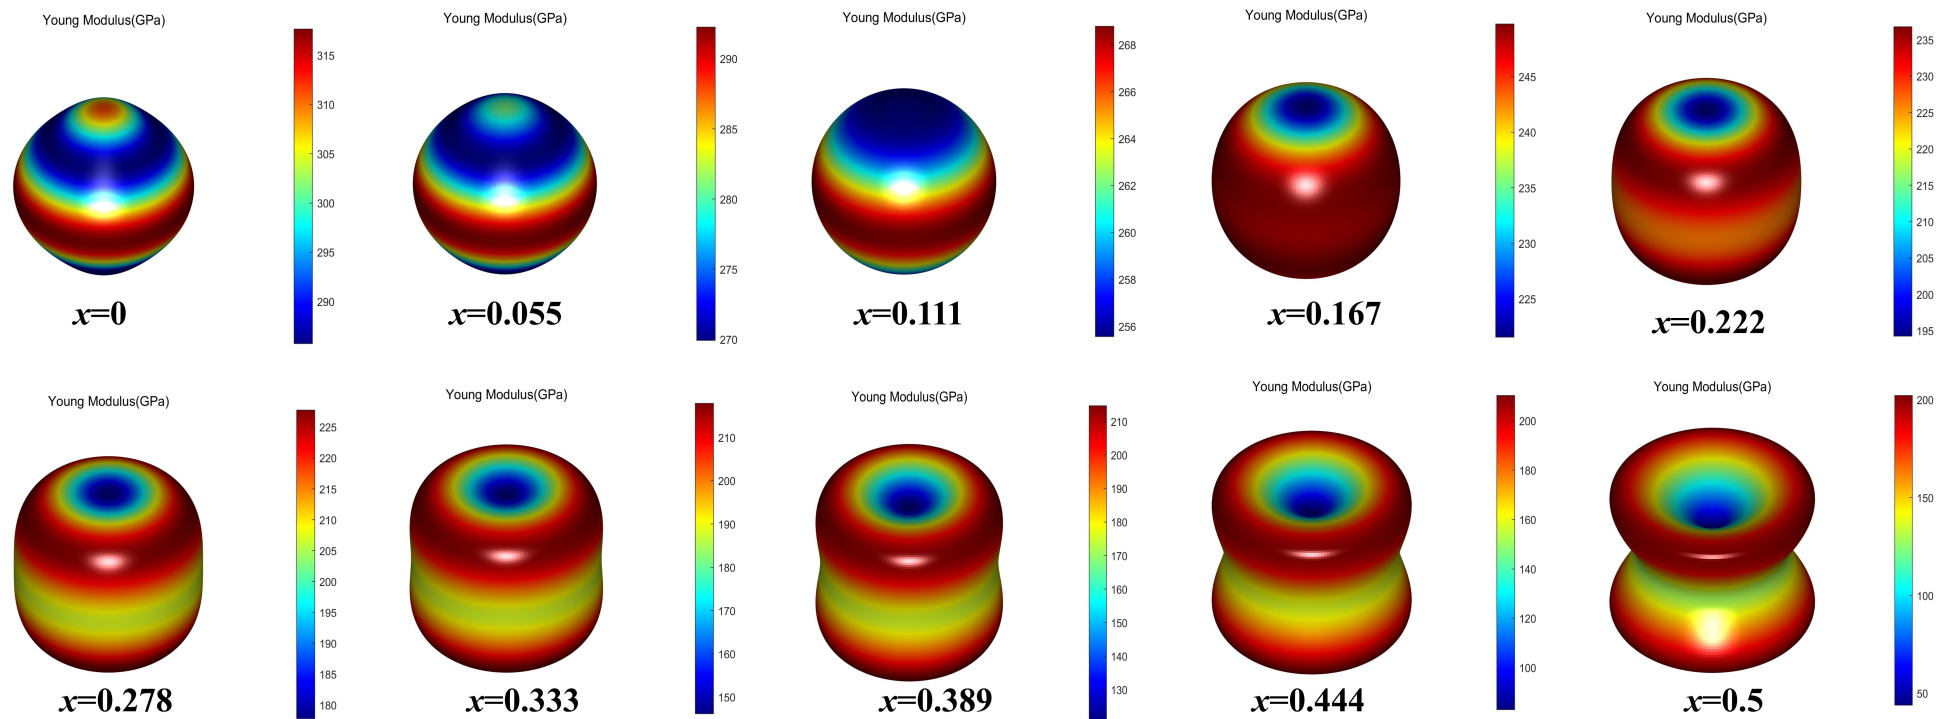

Supplement: d6cp00461j11.pdf [file d6cp00461j11.pdf]

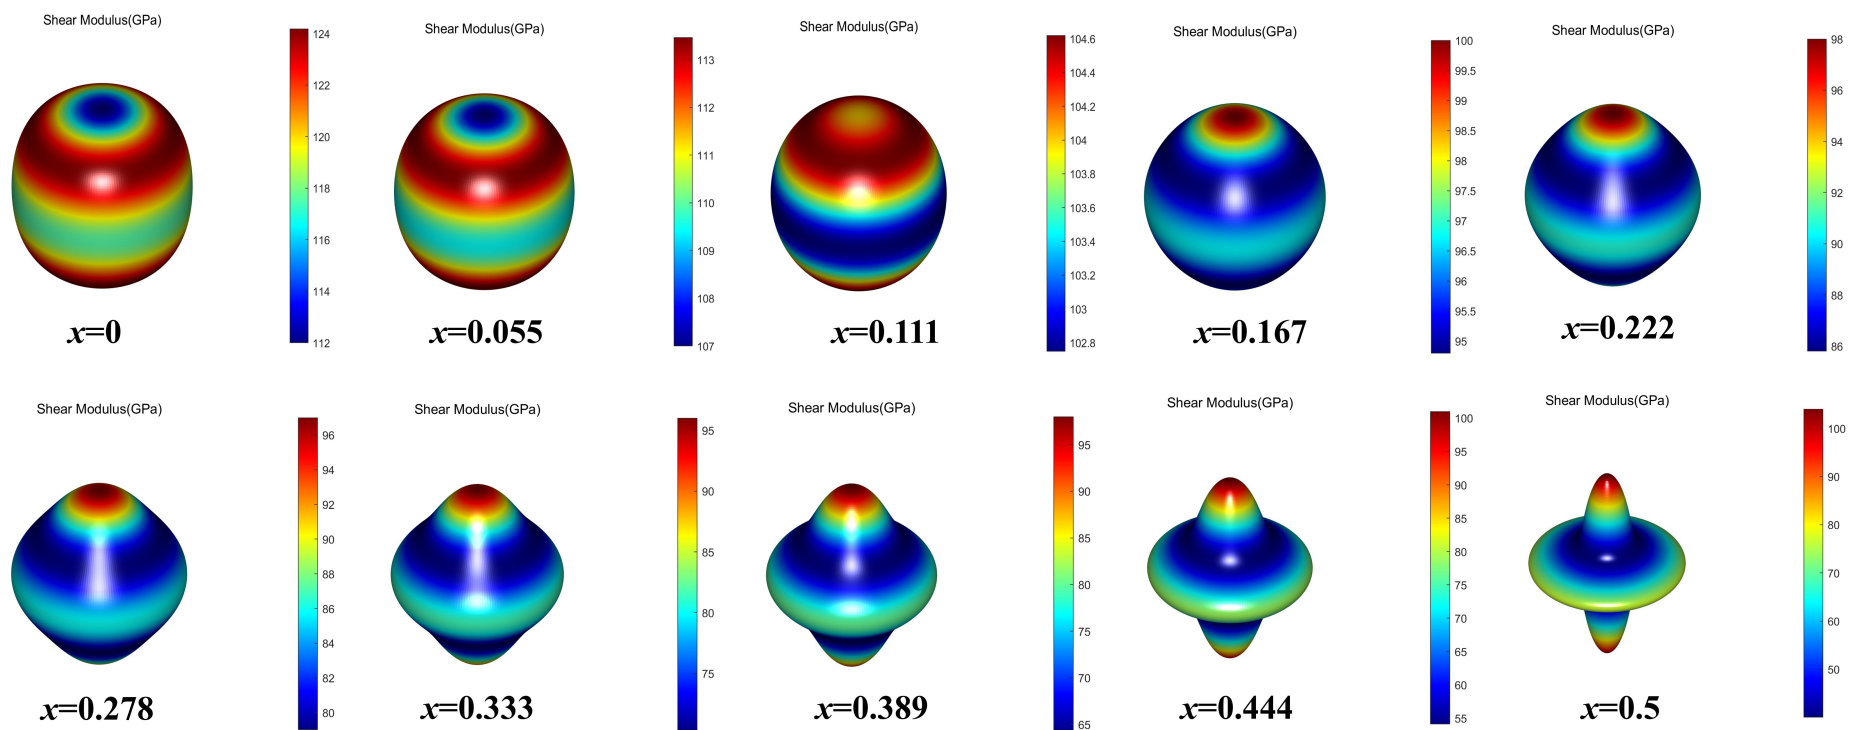

Supplement: d6cp00461j12.pdf [file d6cp00461j12.pdf]

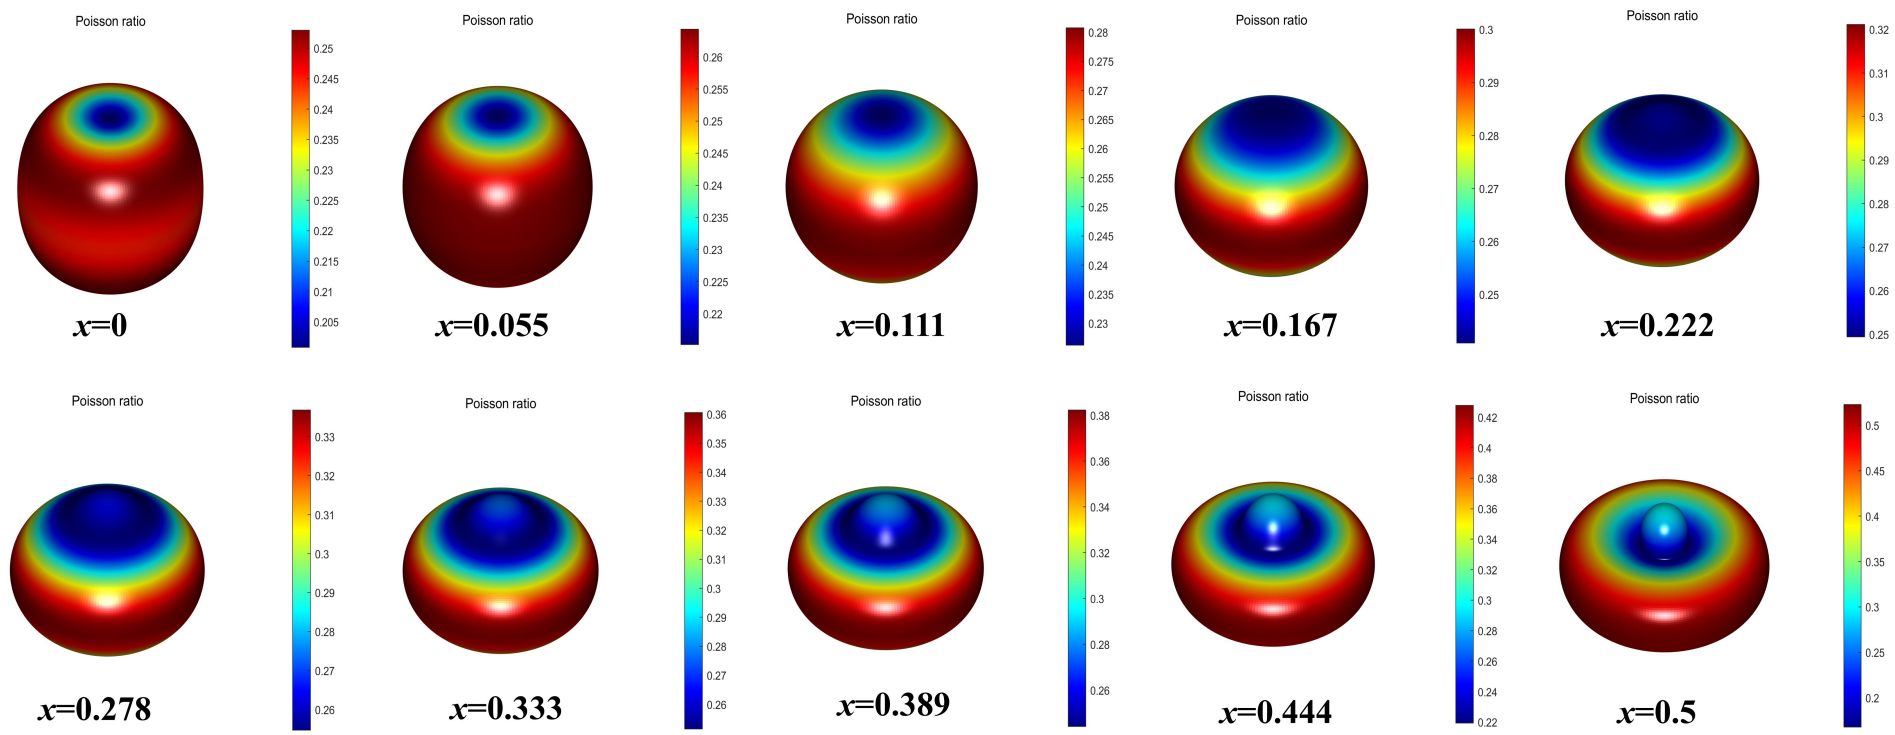

Supplement: d6cp00461j13.pdf [file d6cp00461j13.pdf]

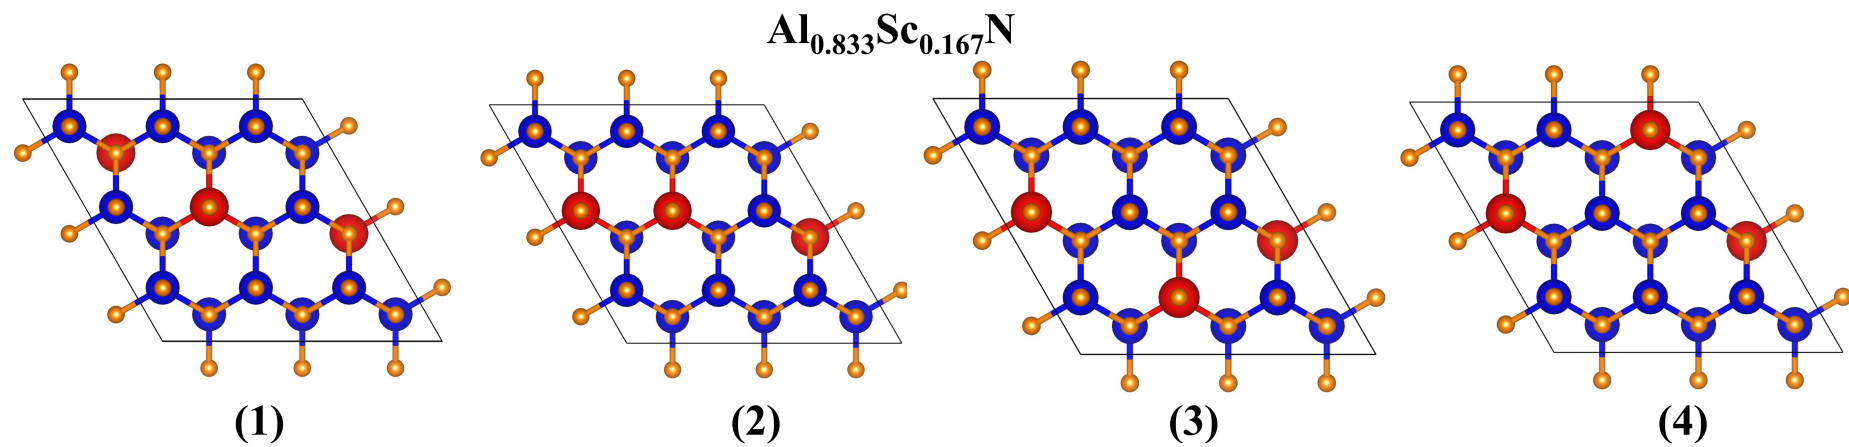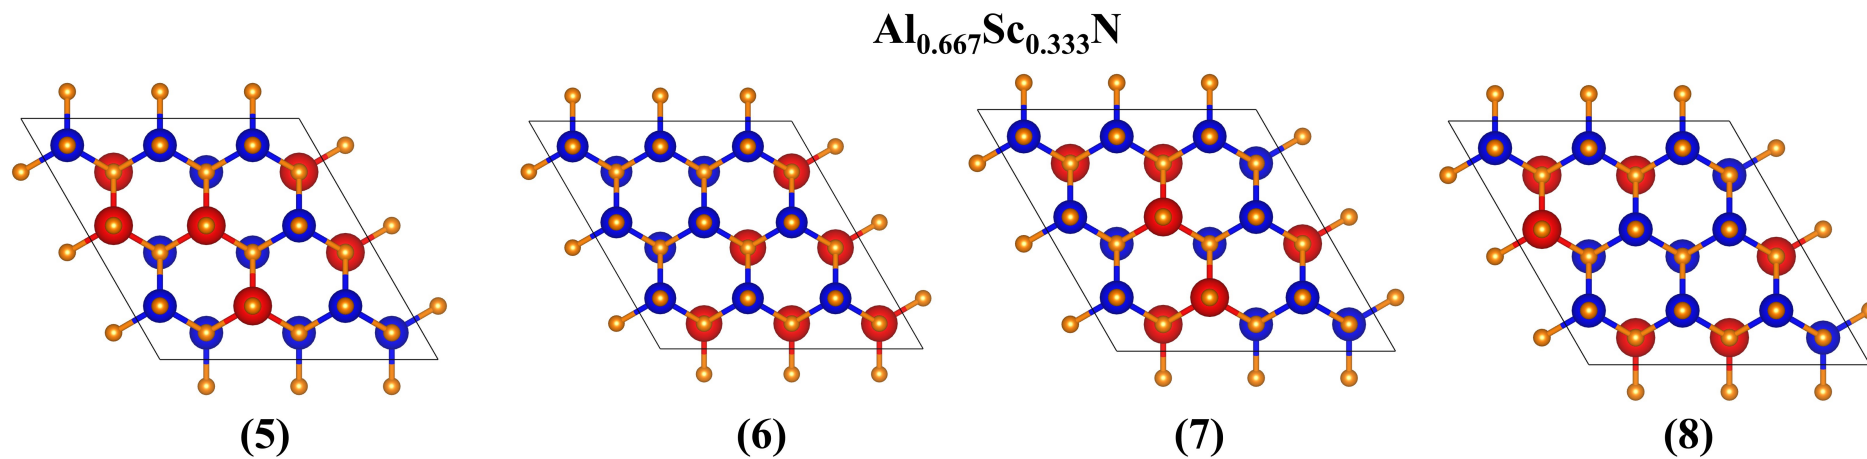

Supplement: d6cp00461j2.pdf [file d6cp00461j2.pdf]

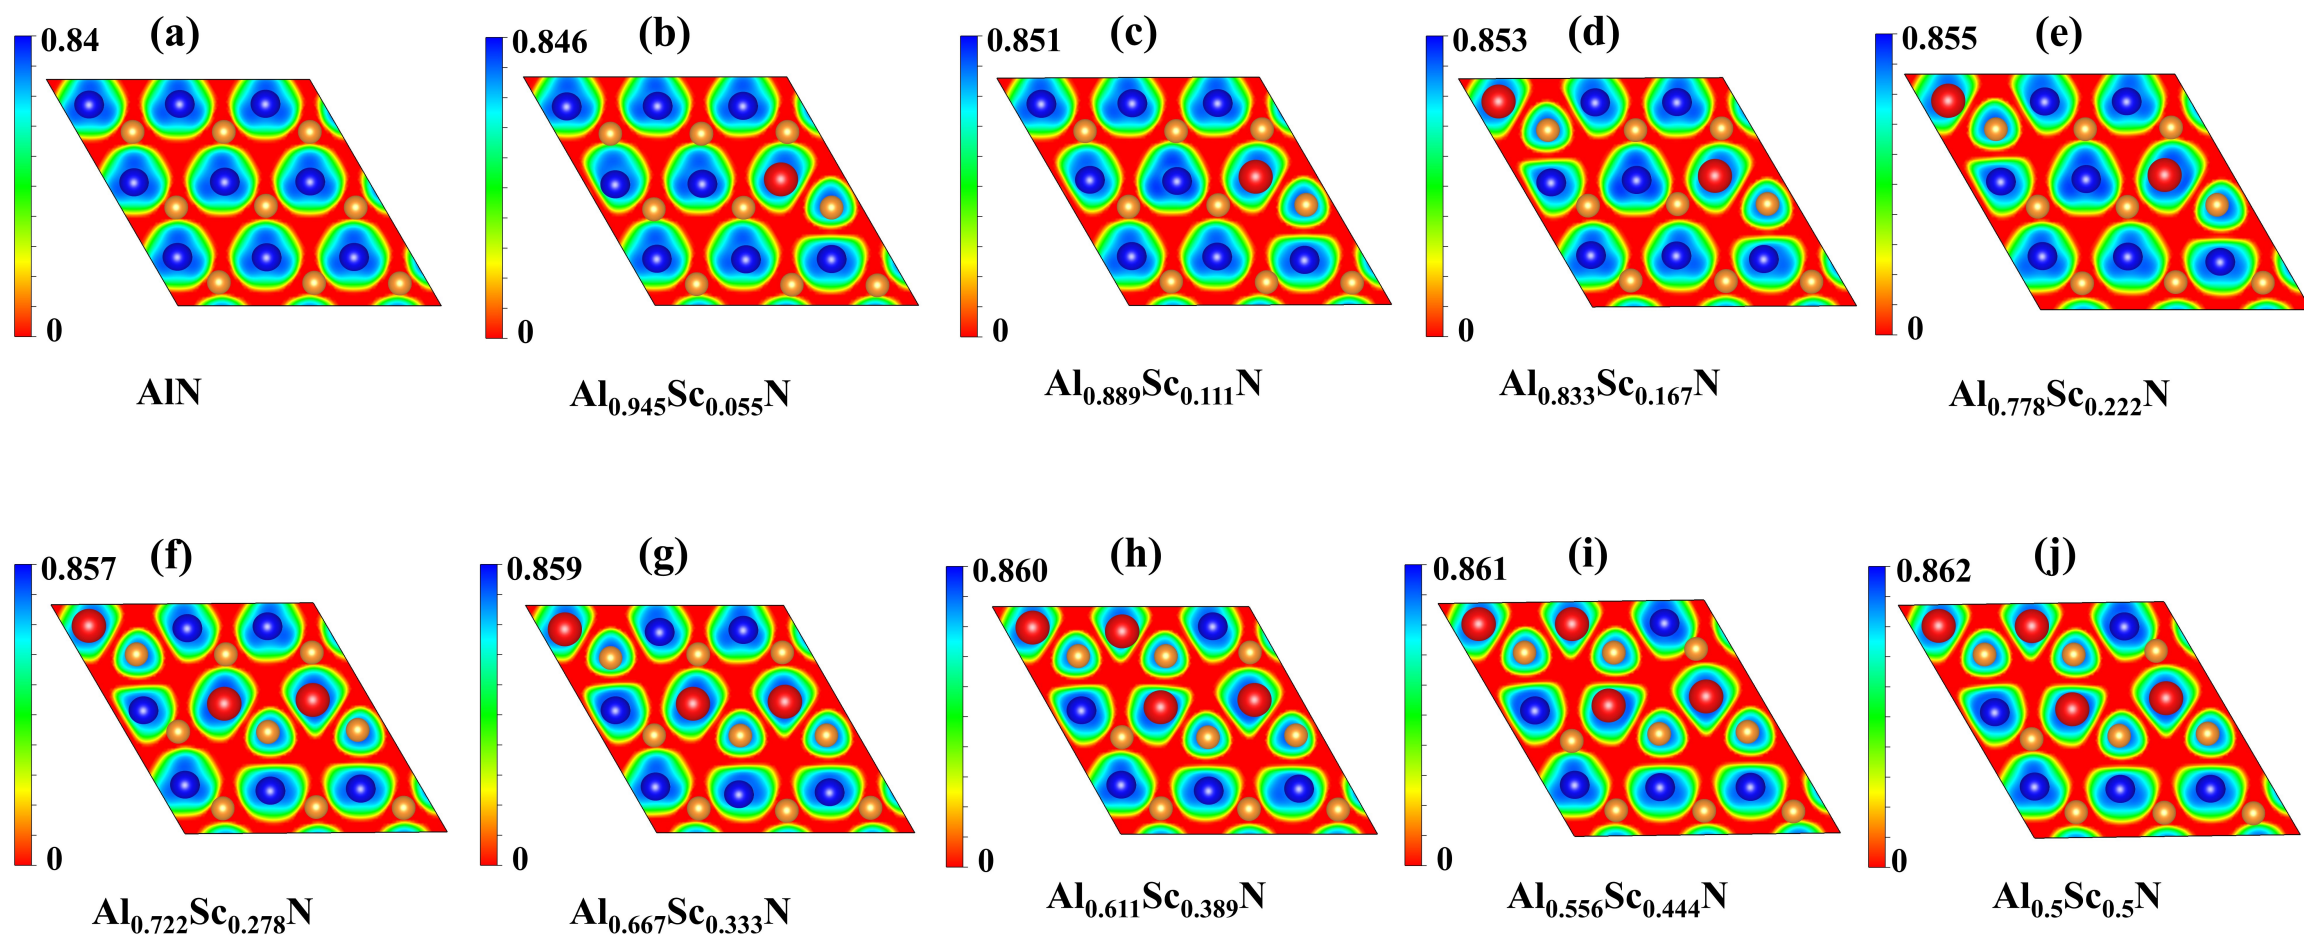

Supplement: d6cp00461j3.pdf [file d6cp00461j3.pdf]

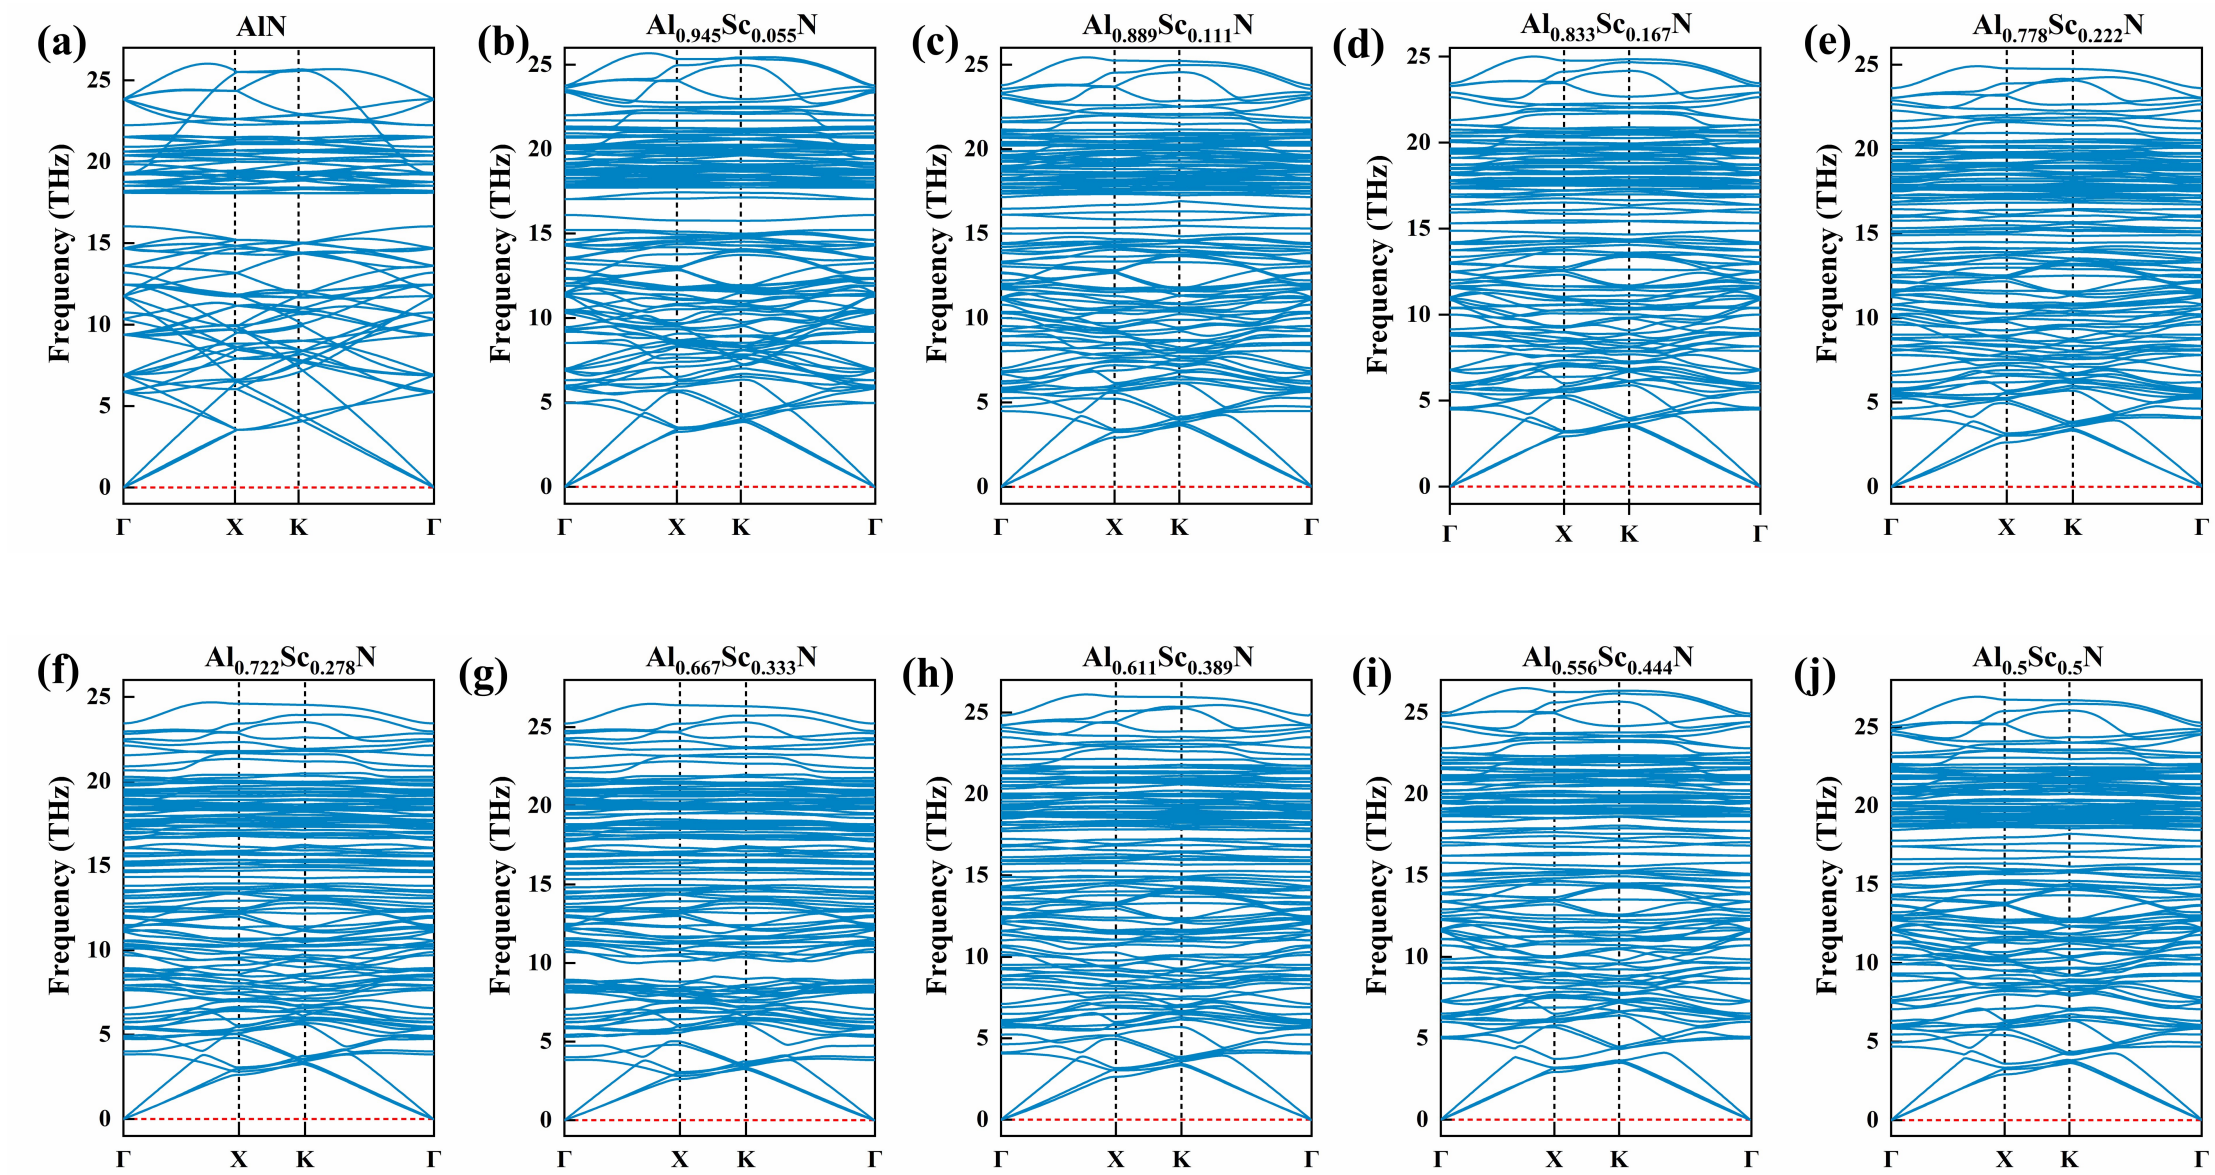

Supplement: d6cp00461j4.pdf [file d6cp00461j4.pdf]

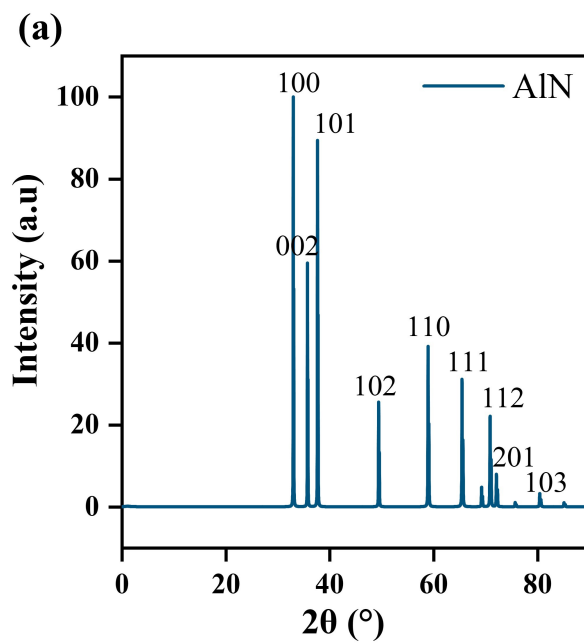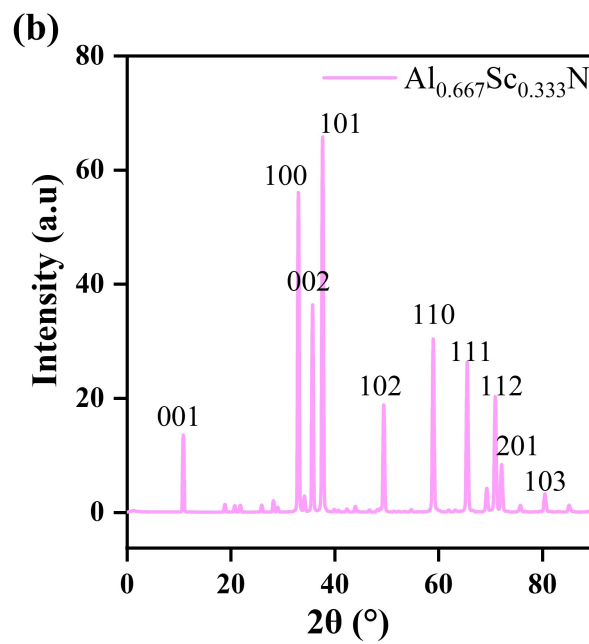

Supplement: d6cp00461j5.pdf [file d6cp00461j5.pdf]

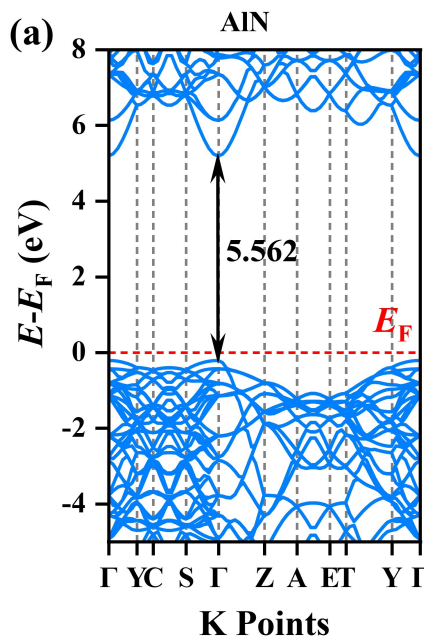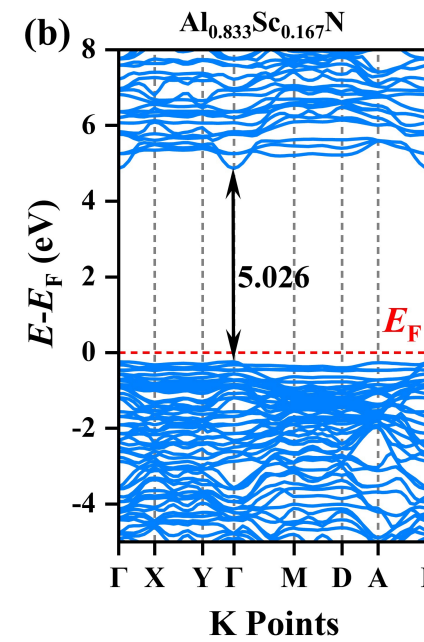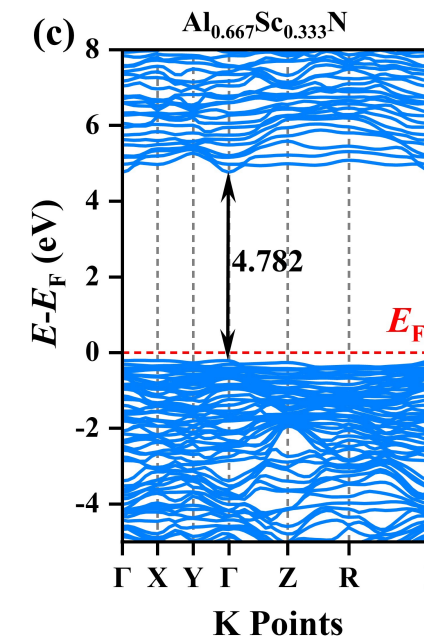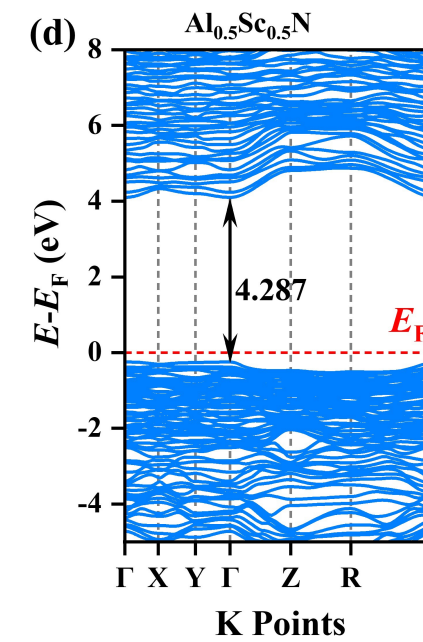

Supplement: d6cp00461j6.pdf [file d6cp00461j6.pdf]

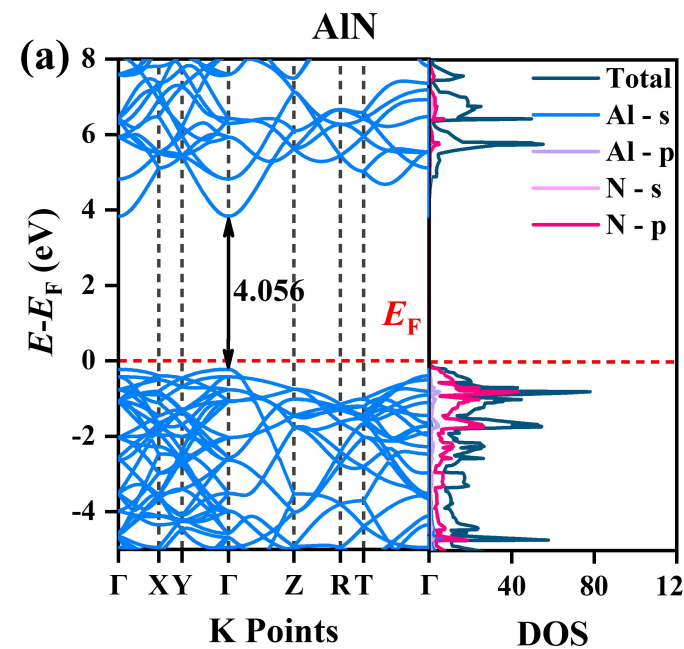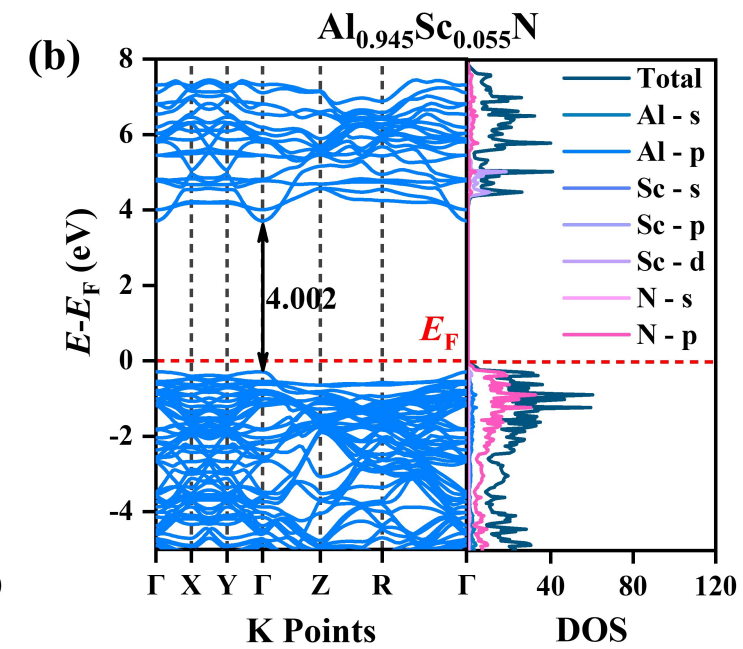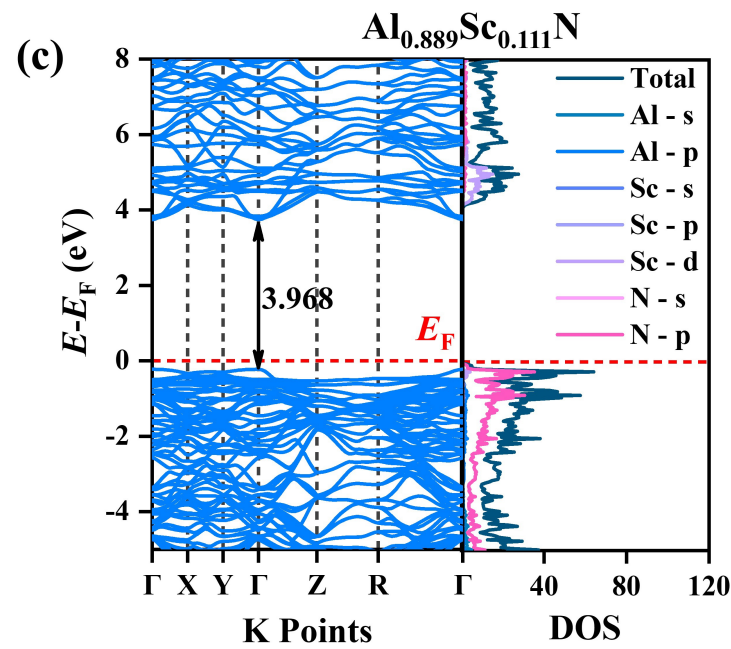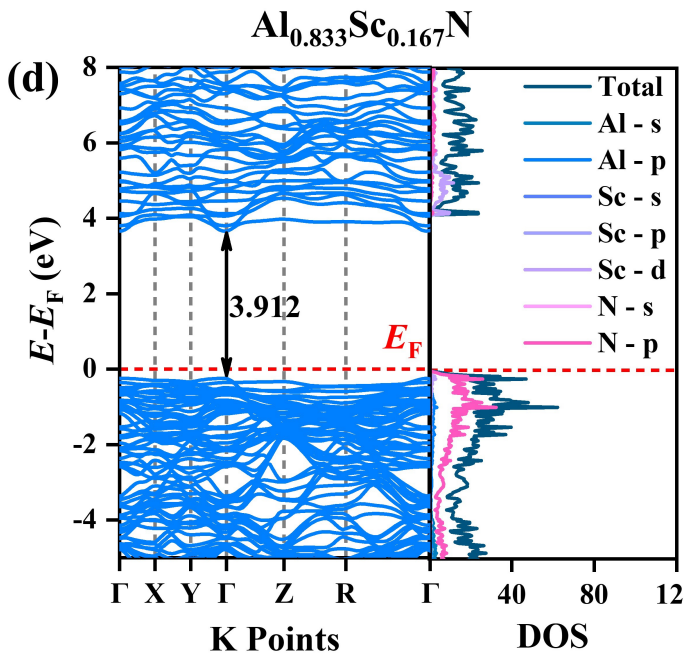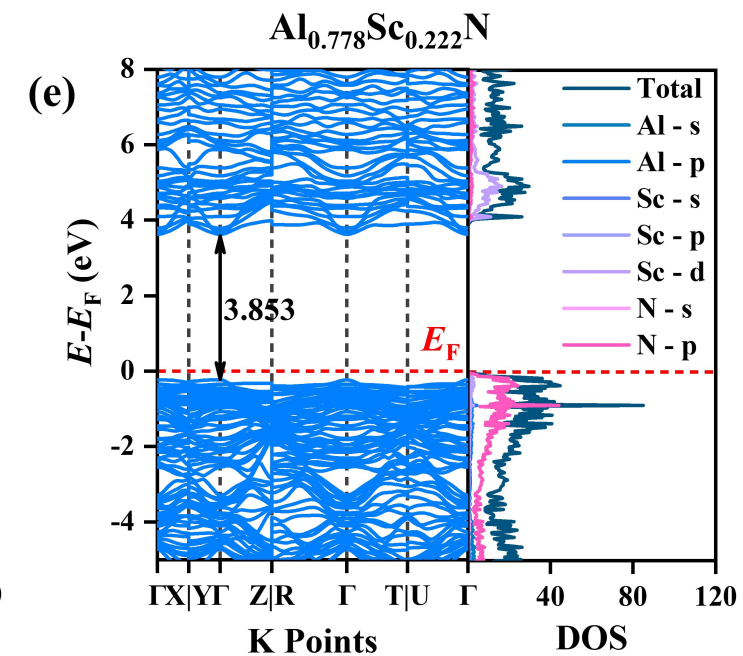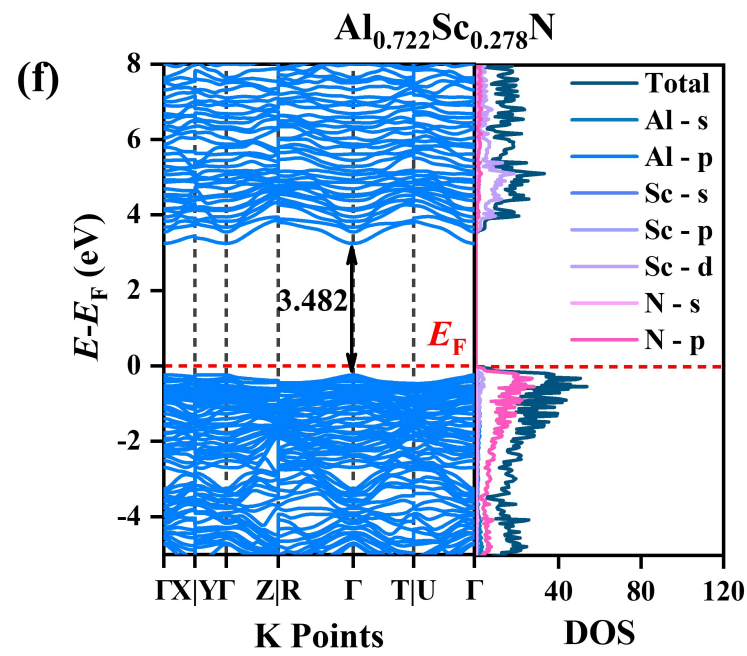

Supplement: d6cp00461j7.pdf [file d6cp00461j7.pdf]

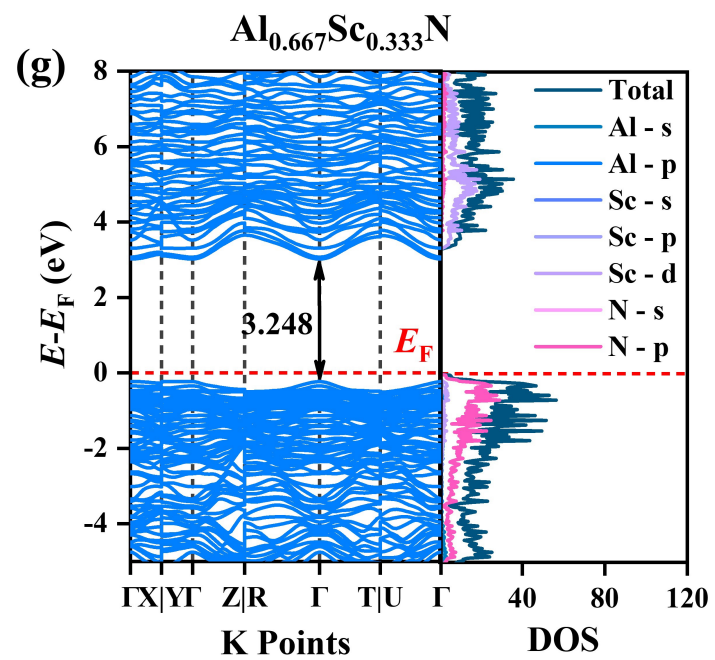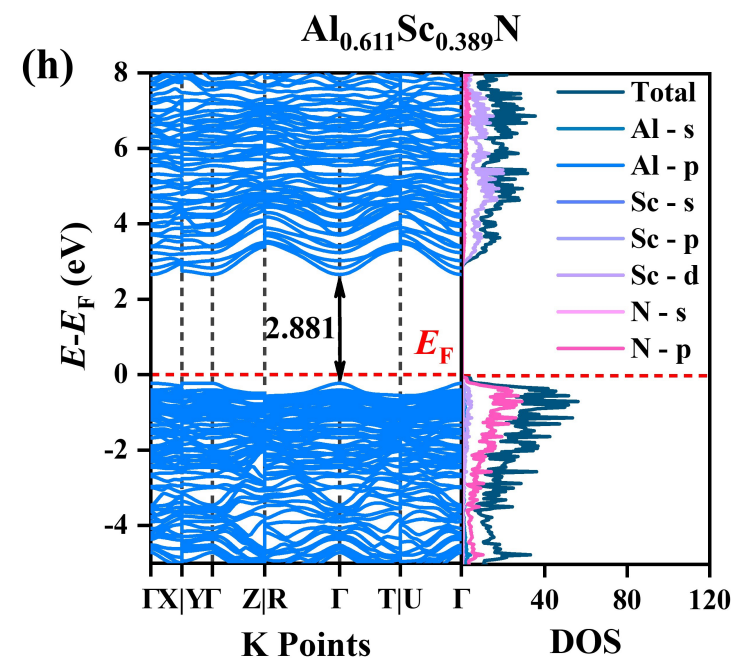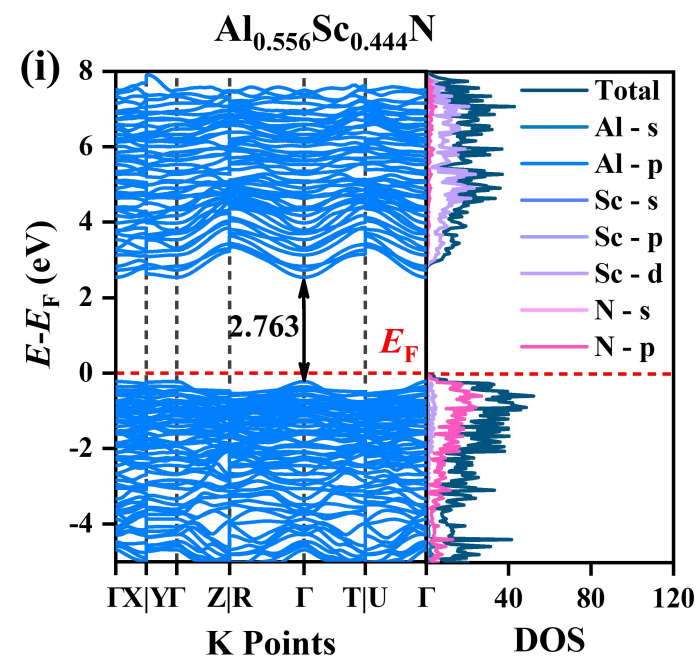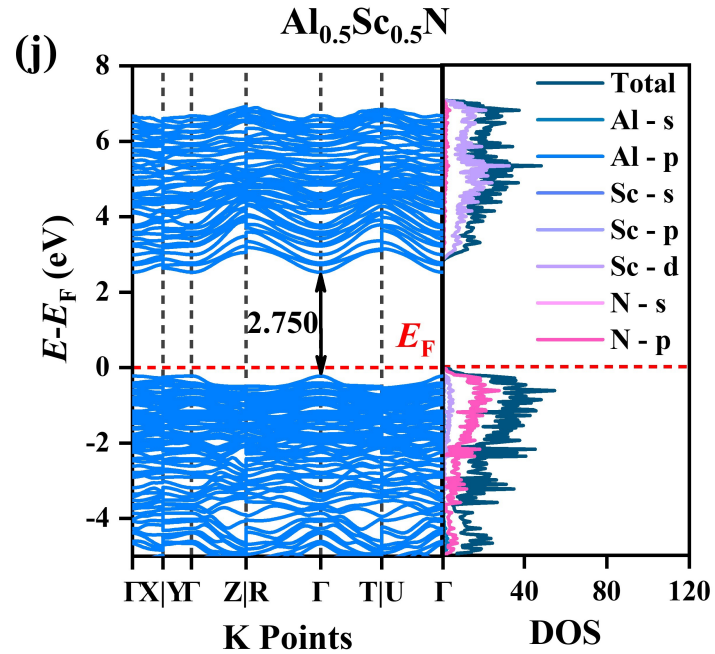

Supplement: d6cp00461j8.pdf [file d6cp00461j8.pdf]

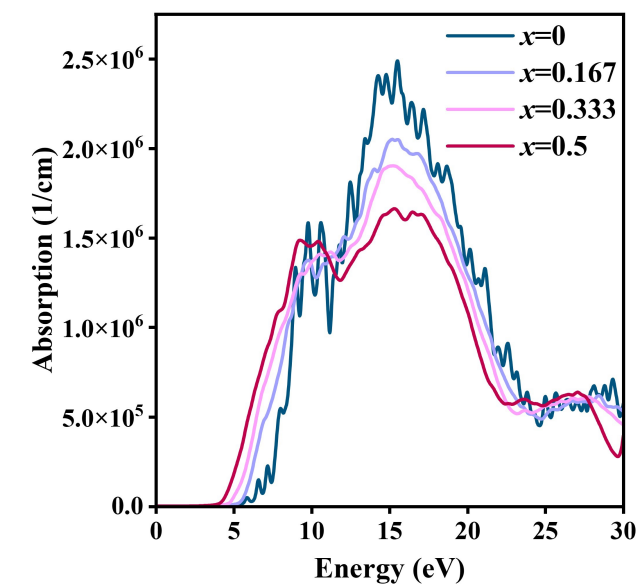

Supplement: d6cp00461j9.pdf [file d6cp00461j9.pdf]
